# Supplementary material for: The custom making of hierarchical micro/nanoscaled titanium phosphate coatings and their formation mechanism analysis
Source: Royal Society of Chemistry journal article supplement (doi:10.1039/c9ra08168b), 2019-01-01
Supplement: c9ra08168b1.pdf [file c9ra08168b1.pdf]

## Supporting Information

### **The Custom Making of Hierarchical Micro/Nanoscaled Titanium Phosphate Coatings and Their formation Mechanism Analysis**

**Bianyun Cai<sup>a</sup>, Nan Jiang<sup>b</sup>, Peijie Tan<sup>b</sup>, Yi Hou<sup>a</sup>, Yubao Li<sup>a\*</sup>, Li Zhang<sup>a\*</sup>, Songsong Zhu<sup>b\*</sup>**

*The \* marked authors are the corresponding authors*

<sup>a</sup> *Analytical & Testing Center, Sichuan University, Chengdu 610065, China*

<sup>b</sup> *State Key Laboratory of Oral Diseases & National Clinical Research Center for Oral Disease & West  
China Hospital of Stomatology, Sichuan University, Chengdu 610065, China*

*E-mail: nic7504@scu.edu.cn (Y. Li); nic1976@scu.edu.cn, zhangli9111@126.com (L. Zhang);  
zss\_1977@163.com (S. Zhu)*

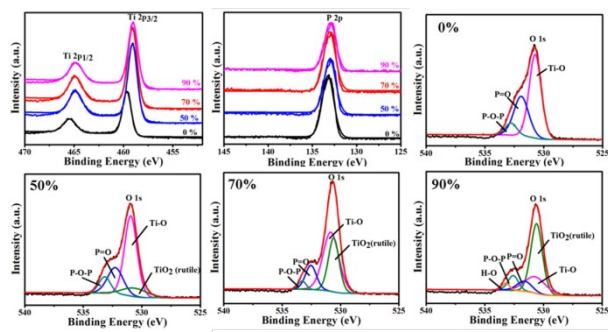

**Fig. S1.** The XPS high resolution spectra for Ti<sub>2p</sub>, P<sub>2p</sub> and O<sub>1s</sub> of the TiP coatings reacted for 24 h in mixed solution with H<sub>2</sub>O<sub>2</sub>/H<sub>3</sub>PO<sub>4</sub> at 9:1 under 120 °C with water content varying from 0 to 90%.

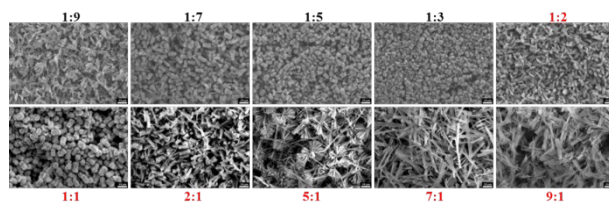

**Fig. S2.** SEM images showing the surface morphology of the TiP coatings reacted for 24 h in mixed solution with  $\text{H}_2\text{O}_2/\text{H}_3\text{PO}_4$  varying from 1:9 to 9:1 containing 70wt% water under  $120^\circ\text{C}$ .

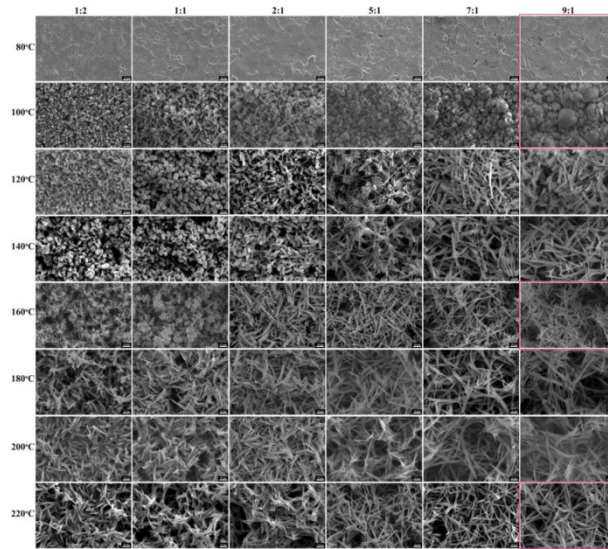

**Fig. S3.** SEM images showing the surface morphology of the TIP coatings reacted for 24 h in mixed solution with  $\text{H}_2\text{O}_2/\text{H}_3\text{PO}_4$  varying from 1:2 to 9:1 containing 70wt% water under different temperature from 80°C to 220°C.

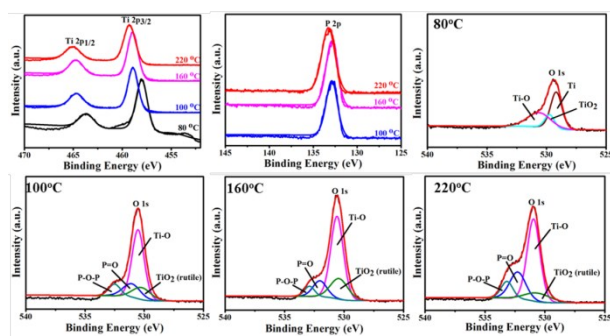

**Fig. S4.** The XPS high resolution spectra for Ti<sub>2p</sub>, P<sub>2p</sub> and O<sub>1s</sub> of the TiP coatings reacted for 24 h in mixed solution with H<sub>2</sub>O<sub>2</sub>/H<sub>3</sub>PO<sub>4</sub> at 9:1 containing 70wt% water under 80 °C, 100 °C, 160 °C and 220 °C, respectively.

**Table S1.** The value of contact angle and surface energy for the TiP coatings reacted for 24 h in mixed solution with H<sub>2</sub>O<sub>2</sub>/H<sub>3</sub>PO<sub>4</sub> at 9:1 containing 70wt% water under 80 °C, 100 °C, 160 °C and 220 °C, respectively.

| <b>Sample</b>             | <b>80 °C</b>      | <b>100 °C</b>    | <b>160 °C</b> | <b>220 °C</b> |
|---------------------------|-------------------|------------------|---------------|---------------|
| <b>Contact Angle (°)</b>  | <b>46.09±4.14</b> | <b>5.57±0.63</b> | <b>0</b>      | <b>0</b>      |
| <b>Surface Energy (J)</b> | <b>55.81±4.32</b> | <b>84.2±3.55</b> | <b>87.08</b>  | <b>87.08</b>  |

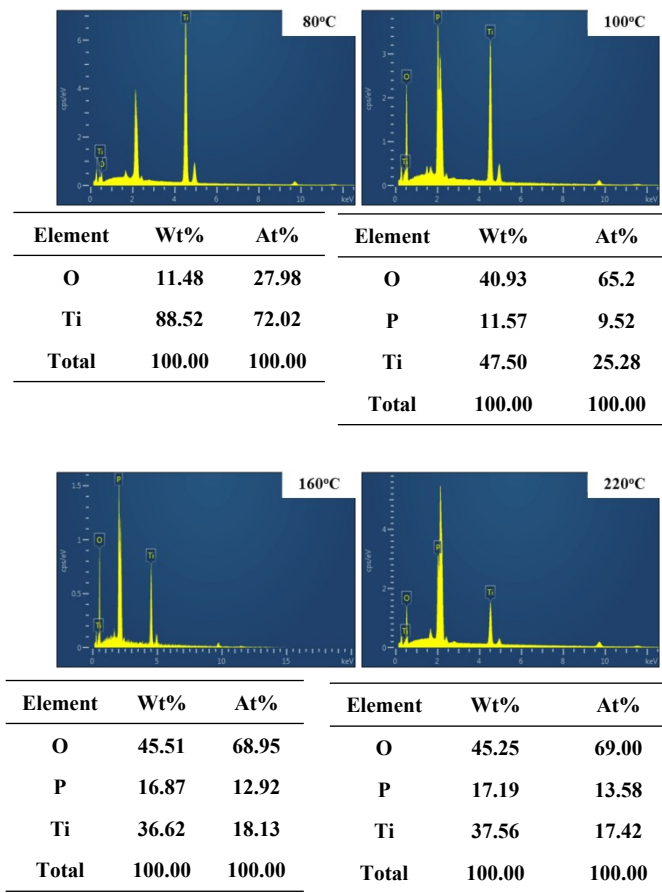

**Fig. S5.** The EDS analysis and element content of the TiP coatings reacted for 24 h in mixed solution with  $\text{H}_2\text{O}_2/\text{H}_3\text{PO}_4$  at 9:1 containing 70wt% water under 80°C, 100°C, 160°C and 220°C, respectively.

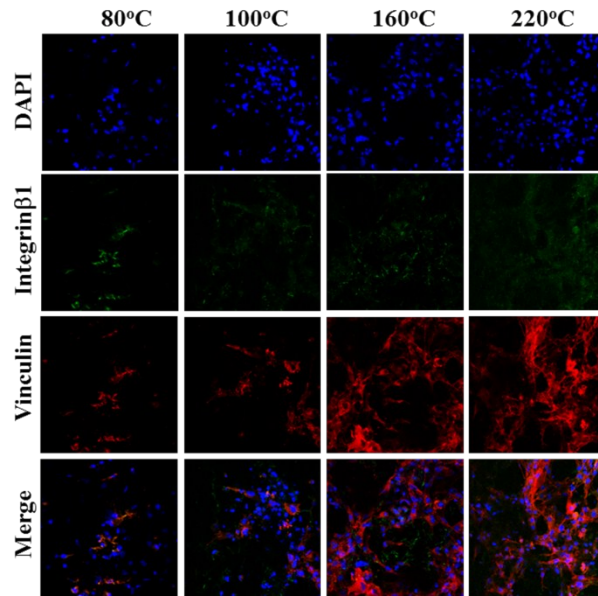

**Fig. S6.** The Integrin $\beta$ 1 and vinculin expressions of BMSCs investigated by CLSM after 48 h incubation on the TIP coatings reacted for 24 h in mixed solution with H<sub>2</sub>O<sub>2</sub>/H<sub>3</sub>PO<sub>4</sub> at 9:1 containing 70wt% water under 80°C, 100°C, 160°C and 220°C, respectively.
